# Supplementary material
Source: PubMed Central journal article supplement (PMC4471118)
Supplement: NIHMS62684-supplement-Supplementary_table.pdf [file NIHMS62684-supplement-Supplementary_table.pdf]

| Name                  | Symbol   | Description                                  | FC (Old v. Young) |
|-----------------------|----------|----------------------------------------------|-------------------|
| A2ML1;1553505_at      | A2ML1    | alpha-2-macroglobulin-like 1                 | 1.31              |
| A2ML1;1564307_a_at    | A2ML1    | alpha-2-macroglobulin-like 1                 | 1.51              |
| AADACL2;240420_at     | AADACL2  | arylamide deacetylase-like 2                 | 1.07              |
| ABCA12;215465_at      | ABCA12   | ATP-binding cassette, sub-family A (ABC1), n | 1.70              |
| ACER1;1553929_at      | ACER1    | alkaline ceramidase 1                        | 1.30              |
| AKR1B10;206561_s_at   | AKR1B10  | aldo-keto reductase family 1, member B10 (   | 0.98              |
| ALDH3B2;204941_s_at   | ALDH3B2  | aldehyde dehydrogenase 3 family, member      | 0.94              |
| ALOX12B;207381_at     | ALOX12B  | arachidonate 12-lipoxygenase, 12R type       | 1.51              |
| ALOXE3;207708_at      | ALOXE3   | arachidonate lipoxygenase 3                  | 1.46              |
| ALOXE3;222383_s_at    | ALOXE3   | arachidonate lipoxygenase 3                  | 1.48              |
| ALS2CL;222333_at      | ALS2CL   | ALS2 C-terminal like                         | 1.09              |
| ANKRD13C;1556361_s_at | ANKRD13C | ankyrin repeat domain 13C                    | 0.96              |
| ANXA9;210085_s_at     | ANXA9    | annexin A9                                   | 1.39              |
| ANXA9;211712_s_at     | ANXA9    | annexin A9                                   | 1.34              |
| ARSF;214490_at        | ARSF     | arylsulfatase F                              | 1.47              |
| ASPRV1;235514_at      | ASPRV1   | aspartic peptidase, retroviral-like 1        | 1.44              |
| ATP10B;214070_s_at    | ATP10B   | ATPase, class V, type 10B                    | 1.21              |
| ATP6V1C2;1552532_a_at | ATP6V1C2 | ATPase, H+ transporting, lysosomal 42kDa, \  | 1.05              |
| ATP6V1C2;1553989_a_at | ATP6V1C2 | ATPase, H+ transporting, lysosomal 42kDa, \  | 1.03              |
| BLMH;202179_at        | BLMH     | bleomycin hydrolase                          | 1.41              |
| BNIPL;1553072_at      | BNIPL    | BCL2/adenovirus E1B 19kD interacting prote   | 0.90              |
| BPIL2;1555773_at      | BPIL2    | bactericidal/permeability-increasing protein | 1.20              |
| C10orf99;227736_at    | C10orf99 | chromosome 10 open reading frame 99          | 1.75              |
| C12orf29;228378_at    | C12orf29 | chromosome 12 open reading frame 29          | 1.15              |
| C1orf116;228865_at    | C1orf116 | chromosome 1 open reading frame 116          | 1.30              |
| C1orf46;216935_at     | C1orf46  | chromosome 1 open reading frame 46           | 1.49              |
| C1orf68;217087_at     | C1orf68  | chromosome 1 open reading frame 68           | 1.18              |
| C9orf169;1569144_a_at | C9orf169 | chromosome 9 open reading frame 169          | 1.43              |
| CALML3;210020_x_at    | CALML3   | calmodulin-like 3                            | 0.87              |
| CALML5;220414_at      | CALML5   | calmodulin-like 5                            | 1.32              |
| CARD18;231733_at      | CARD18   | caspase recruitment domain family, membe     | 1.36              |
| CASP14;231722_at      | CASP14   | caspase 14, apoptosis-related cysteine pepti | 1.37              |
| CDS1;205709_s_at      | CDS1     | CDP-diacylglycerol synthase (phosphatidate   | 1.04              |
| CDS1;226187_at        | CDS1     | CDP-diacylglycerol synthase (phosphatidate   | 1.11              |
| CDSN;206192_at        | CDSN     | corneodesmosin                               | 1.39              |
| CDSN;206193_s_at      | CDSN     | corneodesmosin                               | 1.68              |
| CENPT;218148_at       | CENPT    | centromere protein T                         | 0.98              |
| CHMP4C;226803_at      | CHMP4C   | chromatin modifying protein 4C               | 1.17              |
| CLCA2;206164_at       | CLCA2    | chloride channel accessory 2                 | 1.00              |
| CLCA2;206165_s_at     | CLCA2    | chloride channel accessory 2                 | 1.02              |
| CLCA2;206166_s_at     | CLCA2    | chloride channel accessory 2                 | 1.11              |
| CLCA2;217528_at       | CLCA2    | chloride channel accessory 2                 | 1.00              |
| CLDN1;222549_at       | CLDN1    | claudin 1                                    | 0.99              |
| CLTB;205172_x_at      | CLTB     | clathrin, light chain (Lcb)                  | 1.10              |
| CLTB;206284_x_at      | CLTB     | clathrin, light chain (Lcb)                  | 1.11              |
| CLTB;211043_s_at      | CLTB     | clathrin, light chain (Lcb)                  | 1.04              |
| CNFN;224329_s_at      | CNFN     | cornifelin                                   | 1.67              |
| CPA4;205832_at        | CPA4     | carboxypeptidase A4                          | 0.97              |
| CRCT1;220620_at       | CRCT1    | cysteine-rich C-terminal 1                   | 1.42              |

|                     |          |                                                |      |
|---------------------|----------|------------------------------------------------|------|
| CST6;206595_at      | CST6     | cystatin E/M                                   | 0.93 |
| CWH43;220723_s_at   | CWH43    | cell wall biogenesis 43 C-terminal homolog (   | 1.03 |
| CWH43;220724_at     | CWH43    | cell wall biogenesis 43 C-terminal homolog (   | 1.08 |
| CXCL14;218002_s_at  | CXCL14   | chemokine (C-X-C motif) ligand 14              | 1.10 |
| CXCL14;222484_s_at  | CXCL14   | chemokine (C-X-C motif) ligand 14              | 1.00 |
| CYP4F22;244692_at   | CYP4F22  | cytochrome P450, family 4, subfamily F, poly   | 1.20 |
| D4S234E;209569_x_at | D4S234E  | DNA segment on chromosome 4 (unique) 23        | 1.05 |
| D4S234E;213533_at   | D4S234E  | DNA segment on chromosome 4 (unique) 23        | 1.04 |
| DAPL1;229290_at     | DAPL1    | death associated protein-like 1                | 1.04 |
| DEFB1;210397_at     | DEFB1    | defensin, beta 1                               | 1.09 |
| DEGS2;236496_at     | DEGS2    | degenerative spermatocyte homolog 2, lipid     | 1.12 |
| DENND2C;233294_at   | DENND2C  | DENN/MADD domain containing 2C                 | 0.93 |
| DHRS1;213279_at     | DHRS1    | dehydrogenase/reductase (SDR family) merr      | 0.97 |
| DIO2;203699_s_at    | DIO2     | deiodinase, iodothyronine, type II             | 0.99 |
| DMKN;226926_at      | DMKN     | dermokine                                      | 1.10 |
| DNASE1L2;207192_at  | DNASE1L2 | deoxyribonuclease I-like 2                     | 0.87 |
| DSC1;207324_s_at    | DSC1     | desmocollin 1                                  | 1.03 |
| DSG1;206642_at      | DSG1     | desmoglein 1                                   | 1.02 |
| DSG3;205595_at      | DSG3     | desmoglein 3 (pemphigus vulgaris antigen)      | 0.97 |
| DSG3;235075_at      | DSG3     | desmoglein 3 (pemphigus vulgaris antigen)      | 0.95 |
| DUOX1;215800_at     | DUOX1    | dual oxidase 1                                 | 1.06 |
| DUOXA1;1554648_a_at | DUOXA1   | dual oxidase maturation factor 1               | 0.99 |
| ELF5;220624_s_at    | ELF5     | E74-like factor 5 (ets domain transcription fa | 1.00 |
| ELF5;220625_s_at    | ELF5     | E74-like factor 5 (ets domain transcription fa | 1.25 |
| ELMOD1;231930_at    | ELMOD1   | ELMO/CED-12 domain containing 1                | 1.79 |
| ELOVL4;219532_at    | ELOVL4   | elongation of very long chain fatty acids (FEI | 1.00 |
| EPHX3;220013_at     | EPHX3    | epoxide hydrolase 3                            | 1.24 |
| EPN3;220318_at      | EPN3     | epsin 3                                        | 1.17 |
| EPN3;223895_s_at    | EPN3     | epsin 3                                        | 1.08 |
| EPPK1;208156_x_at   | EPPK1    | epiplakin 1                                    | 1.26 |
| EPPK1;232164_s_at   | EPPK1    | epiplakin 1                                    | 1.08 |
| EPPK1;232165_at     | EPPK1    | epiplakin 1                                    | 1.08 |
| EPPK1;234552_at     | EPPK1    | epiplakin 1                                    | 1.57 |
| EPS8L1;218779_x_at  | EPS8L1   | EPS8-like 1                                    | 1.23 |
| EPS8L1;221655_x_at  | EPS8L1   | EPS8-like 1                                    | 1.23 |
| EPS8L1;221665_s_at  | EPS8L1   | EPS8-like 1                                    | 1.26 |
| EPS8L1;91826_at     | EPS8L1   | EPS8-like 1                                    | 1.21 |
| ESRP2;219395_at     | ESRP2    | epithelial splicing regulatory protein 2       | 1.04 |
| ESYT3;1554912_at    | ESYT3    | extended synaptotagmin-like protein 3          | 1.20 |
| ESYT3;239770_at     | ESYT3    | extended synaptotagmin-like protein 3          | 1.24 |
| EVPL;204503_at      | EVPL     | envoplakin                                     | 1.09 |
| EXPH5;213929_at     | EXPH5    | exophilin 5                                    | 0.86 |
| EXPH5;214734_at     | EXPH5    | exophilin 5                                    | 0.71 |
| FAM59A;219377_at    | FAM59A   | family with sequence similarity 59, member     | 1.07 |
| FBXO45;225100_at    | FBXO45   | F-box protein 45                               | 1.40 |
| FCHSD1;226698_at    | FCHSD1   | FCH and double SH3 domains 1                   | 1.07 |
| FLG;215704_at       | FLG      | filaggrin                                      | 1.13 |
| FLG2;1569410_at     | FLG2     | filaggrin family member 2                      | 1.09 |
| FLJ41603;227717_at  | FLJ41603 | FLJ41603 protein                               | 1.10 |
| FRMPD1;206774_at    | FRMPD1   | FERM and PDZ domain containing 1               | 1.09 |

|                    |         |                                             |      |
|--------------------|---------|---------------------------------------------|------|
| GDA;224209_s_at    | GDA     | guanine deaminase                           | 2.26 |
| GDPD2;220291_at    | GDPD2   | glycerophosphodiester phosphodiesterase d   | 0.95 |
| GDPD3;219722_s_at  | GDPD3   | glycerophosphodiester phosphodiesterase d   | 1.13 |
| GJB2;223278_at     | GJB2    | gap junction protein, beta 2, 26kDa         | 1.04 |
| GJB6;231771_at     | GJB6    | gap junction protein, beta 6, 30kDa         | 1.05 |
| GLTP;219267_at     | GLTP    | glycolipid transfer protein                 | 1.13 |
| GLTP;226177_at     | GLTP    | glycolipid transfer protein                 | 1.07 |
| GPR115;1553031_at  | GPR115  | G protein-coupled receptor 115              | 1.21 |
| GPR87;219936_s_at  | GPR87   | G protein-coupled receptor 87               | 1.17 |
| GRHL1;1552685_a_at | GRHL1   | grainyhead-like 1 (Drosophila)              | 1.11 |
| GRHL1;222830_at    | GRHL1   | grainyhead-like 1 (Drosophila)              | 1.07 |
| GRHL3;232116_at    | GRHL3   | grainyhead-like 3 (Drosophila)              | 1.40 |
| GSDMC;234305_s_at  | GSDMC   | gasdermin C                                 | 0.96 |
| GSTA4;202967_at    | GSTA4   | glutathione S-transferase alpha 4           | 1.03 |
| HAL;206643_at      | HAL     | histidine ammonia-lyase                     | 1.24 |
| HOPX;1566140_at    | HOPX    | HOP homeobox                                | 1.07 |
| HOPX;211597_s_at   | HOPX    | HOP homeobox                                | 1.16 |
| HPGD;203913_s_at   | HPGD    | hydroxyprostaglandin dehydrogenase 15-(N.   | 1.12 |
| HPGD;203914_x_at   | HPGD    | hydroxyprostaglandin dehydrogenase 15-(N.   | 1.17 |
| HPGD;211548_s_at   | HPGD    | hydroxyprostaglandin dehydrogenase 15-(N.   | 1.23 |
| HPGD;211549_s_at   | HPGD    | hydroxyprostaglandin dehydrogenase 15-(N.   | 1.05 |
| HS3ST6;239547_at   | HS3ST6  | heparan sulfate (glucosamine) 3-O-sulfotran | 0.88 |
| HSPC159;219998_at  | HSPC159 | galectin-related protein                    | 1.29 |
| HSPC159;226188_at  | HSPC159 | galectin-related protein                    | 1.09 |
| HYAL4;220249_at    | HYAL4   | hyaluronoglucosaminidase 4                  | 1.44 |
| IDE;203328_x_at    | IDE     | insulin-degrading enzyme                    | 1.56 |
| IDE;217496_s_at    | IDE     | insulin-degrading enzyme                    | 1.57 |
| IFFO2;225615_at    | IFFO2   | intermediate filament family orphan 2       | 0.99 |
| IGFL2;231148_at    | IGFL2   | IGF-like family member 2                    | 0.76 |
| IL18;206295_at     | IL18    | interleukin 18 (interferon-gamma-inducing f | 1.06 |
| IL1F10;224262_at   | IL1F10  | interleukin 1 family, member 10 (theta)     | 2.20 |
| IL1F5;222223_s_at  | IL1F5   | interleukin 1 family, member 5 (delta)      | 1.51 |
| IL1F8;231755_at    | IL1F8   | interleukin 1 family, member 8 (eta)        | 2.61 |
| IL1F9;220322_at    | IL1F9   | interleukin 1 family, member 9              | 1.52 |
| IL20RA;219115_s_at | IL20RA  | interleukin 20 receptor, alpha              | 0.90 |
| IRX4;220225_at     | IRX4    | iroquois homeobox 4                         | 0.85 |
| IVL;214599_at      | IVL     | involucrin                                  | 1.65 |
| JUP;201015_s_at    | JUP     | junction plakoglobin                        | 1.04 |
| KCTD1;226245_at    | KCTD1   | potassium channel tetramerisation domain c  | 0.95 |
| KCTD1;226246_at    | KCTD1   | potassium channel tetramerisation domain c  | 0.96 |
| KCTD4;239787_at    | KCTD4   | potassium channel tetramerisation domain c  | 1.18 |
| KCTD4;240512_x_at  | KCTD4   | potassium channel tetramerisation domain c  | 1.00 |
| KLC3;1570402_at    | KLC3    | kinesin light chain 3                       | 1.02 |
| KLC3;239853_at     | KLC3    | kinesin light chain 3                       | 1.02 |
| KLK10;209792_s_at  | KLK10   | kallikrein-related peptidase 10             | 1.00 |
| KLK10;215808_at    | KLK10   | kallikrein-related peptidase 10             | 1.10 |
| KLK11;205470_s_at  | KLK11   | kallikrein-related peptidase 11             | 0.97 |
| KLK5;222242_s_at   | KLK5    | kallikrein-related peptidase 5              | 1.44 |
| KLK7;205778_at     | KLK7    | kallikrein-related peptidase 7              | 1.27 |
| KLK7;239381_at     | KLK7    | kallikrein-related peptidase 7              | 1.06 |

|                          |              |                                                 |      |
|--------------------------|--------------|-------------------------------------------------|------|
| KLK8;1552319_a_at        | KLK8         | kallikrein-related peptidase 8                  | 1.17 |
| KLK8;206125_s_at         | KLK8         | kallikrein-related peptidase 8                  | 1.19 |
| KRT1;205900_at           | KRT1         | keratin 1                                       | 1.05 |
| KRT10;207023_x_at        | KRT10        | keratin 10                                      | 0.98 |
| KRT10;210633_x_at        | KRT10        | keratin 10                                      | 0.96 |
| KRT10;213287_s_at        | KRT10        | keratin 10                                      | 0.95 |
| KRT14;209351_at          | KRT14        | keratin 14                                      | 0.97 |
| KRT16;209800_at          | KRT16        | keratin 16                                      | 0.89 |
| KRT17;205157_s_at        | KRT17        | keratin 17                                      | 0.58 |
| KRT17;212236_x_at        | KRT17        | keratin 17                                      | 0.70 |
| KRT2;207908_at           | KRT2         | keratin 2                                       | 1.03 |
| KRT23;218963_s_at        | KRT23        | keratin 23 (histone deacetylase inducible)      | 1.41 |
| KRT6A;209125_at          | KRT6A        | keratin 6A                                      | 0.54 |
| KRT6B;209126_x_at        | KRT6B        | keratin 6B                                      | 0.82 |
| KRT6B;213680_at          | KRT6B        | keratin 6B                                      | 0.80 |
| KRT78;1553212_at         | KRT78        | keratin 78                                      | 1.33 |
| KRT78;1553213_a_at       | KRT78        | keratin 78                                      | 1.44 |
| KRT80;231849_at          | KRT80        | keratin 80                                      | 1.27 |
| KRT9;208188_at           | KRT9         | keratin 9                                       | 0.73 |
| KRTDAP;230835_at         | KRTDAP       | keratinocyte differentiation-associated protein | 1.09 |
| LAD1;203287_at           | LAD1         | ladinin 1                                       | 1.11 |
| LAD1;216641_s_at         | LAD1         | ladinin 1                                       | 1.24 |
| LASS3;1554252_a_at       | LASS3        | LAG1 homolog, ceramide synthase 3               | 1.19 |
| LASS3;1554253_a_at       | LASS3        | LAG1 homolog, ceramide synthase 3               | 1.18 |
| LCE1B;1560531_at         | LCE1B        | late cornified envelope 1B                      | 1.24 |
| LCE1E;1559224_at         | LCE1E        | late cornified envelope 1E                      | 1.01 |
| LCE1E;1559226_x_at       | LCE1E        | late cornified envelope 1E                      | 1.01 |
| LCE2B;207710_at          | LCE2B        | late cornified envelope 2B                      | 1.19 |
| LCE3D;224328_s_at        | LCE3D        | late cornified envelope 3D                      | 2.52 |
| LOC100130476;243871_a_at | LOC100130476 | similar to hCG2036711                           | 1.14 |
| LOC284023;238096_at      | LOC284023    | hypothetical protein LOC284023                  | 1.12 |
| LOR;207720_at            | LOR          | loricrin                                        | 1.33 |
| LY6D;206276_at           | LY6D         | lymphocyte antigen 6 complex, locus D           | 1.12 |
| LY6G6C;207114_at         | LY6G6C       | lymphocyte antigen 6 complex, locus G6C         | 1.27 |
| LYNX1;1554179_s_at       | LYNX1        | Ly6/neurotoxin 1                                | 1.74 |
| LYPD3;204952_at          | LYPD3        | LY6/PLAUR domain containing 3                   | 1.14 |
| MAP2;210015_s_at         | MAP2         | microtubule-associated protein 2                | 1.30 |
| MBD1;241813_at           | MBD1         | methyl-CpG binding domain protein 1             | 1.08 |
| MUC15;227238_at          | MUC15        | mucin 15, cell surface associated               | 0.97 |
| MUC15;227241_at          | MUC15        | mucin 15, cell surface associated               | 0.95 |
| MUCL1;1553602_at         | MUCL1        | mucin-like 1                                    | 0.83 |
| MYO5B;225301_s_at        | MYO5B        | myosin VB                                       | 1.22 |
| NA;1556161_a_at          | NA           | NA                                              | 1.99 |
| NA;1556194_a_at          | NA           | NA                                              | 0.88 |
| NA;1558687_a_at          | NA           | NA                                              | 1.05 |
| NA;1570192_at            | NA           | NA                                              | 1.00 |
| NA;206400_at             | NA           | NA                                              | 1.03 |
| NA;208539_x_at           | NA           | NA                                              | 2.84 |
| NA;214580_x_at           | NA           | NA                                              | 0.80 |
| NA;217521_at             | NA           | NA                                              | 1.34 |

|                     |          |                                               |      |
|---------------------|----------|-----------------------------------------------|------|
| NA;219095_at        | NA       | NA                                            | 1.11 |
| NA;227735_s_at      | NA       | NA                                            | 1.80 |
| NA;228587_at        | NA       | NA                                            | 1.01 |
| NA;231033_at        | NA       | NA                                            | 0.87 |
| NA;236069_at        | NA       | NA                                            | 1.40 |
| NA;238710_at        | NA       | NA                                            | 1.32 |
| NA;239736_at        | NA       | NA                                            | 1.15 |
| NA;239841_at        | NA       | NA                                            | 1.14 |
| NA;242951_at        | NA       | NA                                            | 1.20 |
| NA;60528_at         | NA       | NA                                            | 1.12 |
| NIPAL4;230188_at    | NIPAL4   | NIPA-like domain containing 4                 | 1.25 |
| NKPD1;1560430_at    | NKPD1    | NTPase, KAP family P-loop domain containin    | 1.04 |
| NLRP10;1553534_at   | NLRP10   | NLR family, pyrin domain containing 10        | 1.65 |
| NLRX1;1553695_a_at  | NLRX1    | NLR family member X1                          | 1.11 |
| NLRX1;219680_at     | NLRX1    | NLR family member X1                          | 1.18 |
| OTUB2;219369_s_at   | OTUB2    | OTU domain, ubiquitin aldehyde binding 2      | 1.18 |
| OVOL1;206604_at     | OVOL1    | ovo-like 1(Drosophila)                        | 1.48 |
| OVOL1;229396_at     | OVOL1    | ovo-like 1(Drosophila)                        | 1.46 |
| PGLYRP4;220944_at   | PGLYRP4  | peptidoglycan recognition protein 4           | 1.15 |
| PKP1;205724_at      | PKP1     | plakophilin 1 (ectodermal dysplasia/skin frag | 1.17 |
| PKP1;221854_at      | PKP1     | plakophilin 1 (ectodermal dysplasia/skin frag | 0.99 |
| PKP3;209872_s_at    | PKP3     | plakophilin 3                                 | 1.04 |
| PKP3;209873_s_at    | PKP3     | plakophilin 3                                 | 1.02 |
| PNLIPRP3;1558846_at | PNLIPRP3 | pancreatic lipase-related protein 3           | 0.80 |
| POF1B;1555383_a_at  | POF1B    | premature ovarian failure, 1B                 | 1.52 |
| POF1B;219756_s_at   | POF1B    | premature ovarian failure, 1B                 | 1.24 |
| PPL;203407_at       | PPL      | periplakin                                    | 1.08 |
| PPP2R2C;223573_s_at | PPP2R2C  | protein phosphatase 2 (formerly 2A), regula   | 1.30 |
| PPP2R2C;223574_x_at | PPP2R2C  | protein phosphatase 2 (formerly 2A), regula   | 1.19 |
| PRSS8;202525_at     | PRSS8    | protease, serine, 8                           | 1.09 |
| PSAPL1;1564333_a_at | PSAPL1   | prosaposin-like 1                             | 1.46 |
| PSORS1C2;220635_at  | PSORS1C2 | psoriasis susceptibility 1 candidate 2        | 1.74 |
| PTGER3;210833_at    | PTGER3   | prostaglandin E receptor 3 (subtype EP3)      | 1.04 |
| PTGER3;210834_s_at  | PTGER3   | prostaglandin E receptor 3 (subtype EP3)      | 1.22 |
| PTGER3;213933_at    | PTGER3   | prostaglandin E receptor 3 (subtype EP3)      | 1.25 |
| RAB25;218186_at     | RAB25    | RAB25, member RAS oncogene family             | 1.09 |
| RAB38;219412_at     | RAB38    | RAB38, member RAS oncogene family             | 1.00 |
| RDH12;242998_at     | RDH12    | retinol dehydrogenase 12 (all-trans/9-cis/11  | 1.10 |
| RDH13;225467_s_at   | RDH13    | retinol dehydrogenase 13 (all-trans/9-cis)    | 1.13 |
| RHBDL2;1552502_s_at | RHBDL2   | rhomboid, veinlet-like 2 (Drosophila)         | 1.25 |
| RHCG;219554_at      | RHCG     | Rh family, C glycoprotein                     | 1.33 |
| RHOD;209885_at      | RHOD     | ras homolog gene family, member D             | 1.15 |
| RNASE7;233488_at    | RNASE7   | ribonuclease, RNase A family, 7               | 1.17 |
| RNASE7;234699_at    | RNASE7   | ribonuclease, RNase A family, 7               | 1.18 |
| RNASE7;234700_s_at  | RNASE7   | ribonuclease, RNase A family, 7               | 1.21 |
| RNF39;219916_s_at   | RNF39    | ring finger protein 39                        | 1.30 |
| RORA;236266_at      | RORA     | RAR-related orphan receptor A                 | 1.07 |
| RPTN;1553454_at     | RPTN     | repetin                                       | 1.65 |
| SBSN;235272_at      | SBSN     | suprabasin                                    | 1.19 |
| SCEL;232056_at      | SCEL     | sciellin                                      | 1.02 |

|                       |           |                                                |      |
|-----------------------|-----------|------------------------------------------------|------|
| SDCBP2;233565_s_at    | SDCBP2    | syndecan binding protein (syntenin) 2          | 1.01 |
| SDR16C5;238017_at     | SDR16C5   | short chain dehydrogenase/reductase family     | 1.08 |
| SDR9C7;1553077_at     | SDR9C7    | short chain dehydrogenase/reductase family     | 1.71 |
| SERPINB12;1553057_at  | SERPINB12 | serpin peptidase inhibitor, clade B (ovalbum   | 1.41 |
| SERPINB13;211361_s_at | SERPINB13 | serpin peptidase inhibitor, clade B (ovalbum   | 1.45 |
| SERPINB13;211362_s_at | SERPINB13 | serpin peptidase inhibitor, clade B (ovalbum   | 1.47 |
| SERPINB13;217272_s_at | SERPINB13 | serpin peptidase inhibitor, clade B (ovalbum   | 1.41 |
| SERPINB5;204855_at    | SERPINB5  | serpin peptidase inhibitor, clade B (ovalbum   | 1.02 |
| SERPINB7;206421_s_at  | SERPINB7  | serpin peptidase inhibitor, clade B (ovalbum   | 1.54 |
| SFN;209260_at         | SFN       | stratifin                                      | 1.02 |
| SFN;33322_i_at        | SFN       | stratifin                                      | 0.98 |
| SFN;33323_r_at        | SFN       | stratifin                                      | 0.94 |
| SLC39A2;220413_at     | SLC39A2   | solute carrier family 39 (zinc transporter), m | 1.93 |
| SLC5A1;206628_at      | SLC5A1    | solute carrier family 5 (sodium/glucose cotra  | 1.59 |
| SLC5A1;242773_at      | SLC5A1    | solute carrier family 5 (sodium/glucose cotra  | 1.74 |
| SLURP1;214536_at      | SLURP1    | secreted LY6/PLAUR domain containing 1         | 1.51 |
| SMPD3;219695_at       | SMPD3     | sphingomyelin phosphodiesterase 3, neutral     | 1.13 |
| SPINK5;205185_at      | SPINK5    | serine peptidase inhibitor, Kazal type 5       | 1.13 |
| SPINK7;223720_at      | SPINK7    | serine peptidase inhibitor, Kazal type 7 (puta | 1.37 |
| SPRR1A;213796_at      | SPRR1A    | small proline-rich protein 1A                  | 1.22 |
| SPRR1A;214549_x_at    | SPRR1A    | small proline-rich protein 1A                  | 1.21 |
| SPRR1B;205064_at      | SPRR1B    | small proline-rich protein 1B (cornifin)       | 1.14 |
| SPRR2G;236119_s_at    | SPRR2G    | small proline-rich protein 2G                  | 2.12 |
| SPRR3;232082_x_at     | SPRR3     | small proline-rich protein 3                   | 1.51 |
| SPRR4;1552620_at      | SPRR4     | small proline-rich protein 4                   | 0.63 |
| SPTLC3;227752_at      | SPTLC3    | serine palmitoyltransferase, long chain base   | 1.43 |
| SULT2B1;205759_s_at   | SULT2B1   | sulfotransferase family, cytosolic, 2B, memb   | 1.22 |
| TGM1;206008_at        | TGM1      | transglutaminase 1 (K polypeptide epiderma     | 1.45 |
| TGM3;206004_at        | TGM3      | transglutaminase 3 (E polypeptide, protein-ε   | 1.22 |
| TGM5;207911_s_at      | TGM5      | transglutaminase 5                             | 0.92 |
| TM7SF2;210130_s_at    | TM7SF2    | transmembrane 7 superfamily member 2           | 1.02 |
| TMEM40;219503_s_at    | TMEM40    | transmembrane protein 40                       | 1.07 |
| TMEM40;222892_s_at    | TMEM40    | transmembrane protein 40                       | 1.06 |
| TMEM45A;219410_at     | TMEM45A   | transmembrane protein 45A                      | 1.17 |
| TMEM54;225536_at      | TMEM54    | transmembrane protein 54                       | 1.02 |
| TMEM79;223544_at      | TMEM79    | transmembrane protein 79                       | 1.06 |
| TMEM86A;227570_at     | TMEM86A   | transmembrane protein 86A                      | 1.44 |
| TMEM86A;242103_at     | TMEM86A   | transmembrane protein 86A                      | 1.27 |
| TMPRSS11E;220431_at   | TMPRSS11E | transmembrane protease, serine 11E             | 0.46 |
| TMPRSS13;223659_at    | TMPRSS13  | transmembrane protease, serine 13              | 1.39 |
| TPRG1;229764_at       | TPRG1     | tumor protein p63 regulated 1                  | 1.40 |
| TREX2;211788_s_at     | TREX2     | three prime repair exonuclease 2               | 1.09 |
| TRIM29;202504_at      | TRIM29    | tripartite motif-containing 29                 | 0.94 |
| TRIM29;211002_s_at    | TRIM29    | tripartite motif-containing 29                 | 1.01 |
| TRY6;215395_x_at      | TRY6      | trypsinogen C                                  | 1.04 |
| TUFT1;205807_s_at     | TUFT1     | tuftelin 1                                     | 0.98 |
| UPK1A;214624_at       | UPK1A     | uroplakin 1A                                   | 0.41 |
| VSIG10L;238654_at     | VSIG10L   | V-set and immunoglobulin domain containir      | 1.28 |
| WFDC12;1553081_at     | WFDC12    | WAP four-disulfide core domain 12              | 1.73 |
| WFDC5;242204_at       | WFDC5     | WAP four-disulfide core domain 5               | 1.13 |

|                       |          |                                              |      |
|-----------------------|----------|----------------------------------------------|------|
| XKRX;230349_at        | XKRX     | XK, Kell blood group complex subunit-related | 1.37 |
| ZNF750;219995_s_at    | ZNF750   | zinc finger protein 750                      | 0.94 |
| AHNAK2;212992_at      | AHNAK2   | AHNAK nucleoprotein 2                        | 0.98 |
| ARHGAP32;210791_s_at  | ARHGAP32 | Rho GTPase activating protein 32             | 1.12 |
| ARHGAP32;242196_at    | ARHGAP32 | Rho GTPase activating protein 32             | 0.95 |
| ARHGEF4;205109_s_at   | ARHGEF4  | Rho guanine nucleotide exchange factor (GE)  | 0.97 |
| ARHGEF5;204765_at     | ARHGEF5  | Rho guanine nucleotide exchange factor (GE)  | 1.11 |
| ATP13A4;1557136_at    | ATP13A4  | ATPase type 13A4                             | 1.25 |
| AZGP1;209309_at       | AZGP1    | alpha-2-glycoprotein 1, zinc-binding         | 1.03 |
| AZGP1;217014_s_at     | AZGP1    | alpha-2-glycoprotein 1, zinc-binding         | 1.06 |
| BAIAP2;209502_s_at    | BAIAP2   | BAI1-associated protein 2                    | 0.99 |
| BNIP1;236534_at       | BNIP1    | BCL2/adenovirus E1B 19kD interacting prote   | 1.07 |
| BSPRY;218792_s_at     | BSPRY    | B-box and SPRY domain containing             | 1.27 |
| C3orf57;238702_at     | C3orf57  | chromosome 3 open reading frame 57           | 1.10 |
| C5orf46;1554195_a_at  | C5orf46  | chromosome 5 open reading frame 46           | 1.34 |
| CCDC64B;235095_at     | CCDC64B  | coiled-coil domain containing 64B            | 1.00 |
| CCDC85C;222809_x_at   | CCDC85C  | coiled-coil domain containing 85C            | 1.03 |
| CELSR2;36499_at       | CELSR2   | cadherin, EGF LAG seven-pass G-type recept   | 1.03 |
| CES8;228903_at        | CES8     | carboxylesterase 8 (putative)                | 1.09 |
| CXCL14;237038_at      | CXCL14   | chemokine (C-X-C motif) ligand 14            | 0.95 |
| D4S234E;209570_s_at   | D4S234E  | DNA segment on chromosome 4 (unique) 23      | 1.06 |
| DENND2C;230769_at     | DENND2C  | DENN/MADD domain containing 2C               | 1.11 |
| DNAJB2;202500_at      | DNAJB2   | DnaJ (Hsp40) homolog, subfamily B, membe     | 1.13 |
| DSC3;206032_at        | DSC3     | desmocollin 3                                | 0.92 |
| DUOX1;219597_s_at     | DUOX1    | dual oxidase 1                               | 1.06 |
| DUOXA1;1555404_a_at   | DUOXA1   | dual oxidase maturation factor 1             | 1.07 |
| EFNA3;210132_at       | EFNA3    | ephrin-A3                                    | 1.05 |
| EMILIN3;228307_at     | EMILIN3  | elastin microfibril interfacier 3            | 0.92 |
| ENDOU;206605_at       | ENDOU    | endonuclease, polyU-specific                 | 0.87 |
| EPN2;203464_s_at      | EPN2     | epsin 2                                      | 1.00 |
| FAM160A1;242687_at    | FAM160A1 | family with sequence similarity 160, membe   | 1.16 |
| FAM83H;226129_at      | FAM83H   | family with sequence similarity 83, member   | 0.95 |
| FAM84A;234331_s_at    | FAM84A   | family with sequence similarity 84, member   | 0.75 |
| FGF11;227271_at       | FGF11    | fibroblast growth factor 11                  | 1.05 |
| GAN;220124_at         | GAN      | gigaxonin                                    | 1.40 |
| GGT6;236225_at        | GGT6     | gamma-glutamyltransferase 6                  | 0.96 |
| GJB5;206156_at        | GJB5     | gap junction protein, beta 5, 31.1kDa        | 1.23 |
| GPR115;237690_at      | GPR115   | G protein-coupled receptor 115               | 1.09 |
| GRAMD1C;219313_at     | GRAMD1C  | GRAM domain containing 1C                    | 0.95 |
| HNRNPC;235500_at      | HNRNPC   | heterogeneous nuclear ribonucleoprotein C    | 1.02 |
| IDE;203327_at         | IDE      | insulin-degrading enzyme                     | 1.38 |
| IL1F7;221470_s_at     | IL1F7    | interleukin 1 family, member 7 (zeta)        | 1.64 |
| IL1F7;224555_x_at     | IL1F7    | interleukin 1 family, member 7 (zeta)        | 1.63 |
| IL20RB;228575_at      | IL20RB   | interleukin 20 receptor beta                 | 1.00 |
| IL22RA1;220056_at     | IL22RA1  | interleukin 22 receptor, alpha 1             | 1.46 |
| IRX2;228462_at        | IRX2     | iroquois homeobox 2                          | 0.85 |
| KCNK7;220412_x_at     | KCNK7    | potassium channel, subfamily K, member 7     | 1.00 |
| KCNK7;224008_s_at     | KCNK7    | potassium channel, subfamily K, member 7     | 0.94 |
| KCNK7;224055_x_at     | KCNK7    | potassium channel, subfamily K, member 7     | 0.96 |
| KIAA1543;1568617_a_at | KIAA1543 | KIAA1543                                     | 0.84 |

|                       |              |                                                |      |
|-----------------------|--------------|------------------------------------------------|------|
| KLF5;209211_at        | KLF5         | Kruppel-like factor 5 (intestinal)             | 0.93 |
| KLF8;219930_at        | KLF8         | Kruppel-like factor 8                          | 0.88 |
| LNX1;223611_s_at      | LNX1         | ligand of numb-protein X 1                     | 1.09 |
| LOC100288860;239127_a | LOC100288860 | hypothetical protein LOC100288860              | 1.04 |
| MPZL3;227747_at       | MPZL3        | myelin protein zero-like 3                     | 1.34 |
| MYO6;203215_s_at      | MYO6         | myosin VI                                      | 1.09 |
| NA;1562921_at         | NA           | NA                                             | 0.83 |
| NA;1568932_at         | NA           | NA                                             | 0.95 |
| NA;202712_s_at        | NA           | NA                                             | 0.85 |
| NA;230778_at          | NA           | NA                                             | 1.09 |
| NA;231311_at          | NA           | NA                                             | 1.01 |
| NA;232202_at          | NA           | NA                                             | 0.98 |
| NA;232699_at          | NA           | NA                                             | 1.17 |
| NA;235651_at          | NA           | NA                                             | 1.03 |
| NA;240361_at          | NA           | NA                                             | 1.19 |
| NA;241300_at          | NA           | NA                                             | 1.40 |
| NA;241356_at          | NA           | NA                                             | 1.05 |
| NA;241890_at          | NA           | NA                                             | 1.27 |
| NA;244107_at          | NA           | NA                                             | 0.93 |
| NDFIP2;224801_at      | NDFIP2       | Nedd4 family interacting protein 2             | 0.88 |
| NEBL;203962_s_at      | NEBL         | nebulette                                      | 0.97 |
| NIPAL2;227001_at      | NIPAL2       | NIPA-like domain containing 2                  | 1.02 |
| OSBPL6;223805_at      | OSBPL6       | oxysterol binding protein-like 6               | 1.12 |
| PDZD2;209493_at       | PDZD2        | PDZ domain containing 2                        | 0.93 |
| PERP;236009_at        | PERP         | PERP, TP53 apoptosis effector                  | 1.10 |
| PIGN;232101_s_at      | PIGN         | phosphatidylinositol glycan anchor biosynth    | 1.00 |
| PITPNM3;230076_at     | PITPNM3      | PITPNM family member 3                         | 0.93 |
| PLA2G3;220780_at      | PLA2G3       | phospholipase A2, group III                    | 1.42 |
| PLAC2;229385_s_at     | PLAC2        | placenta-specific 2 (non-protein coding)       | 1.06 |
| PPP1R13L;218849_s_at  | PPP1R13L     | protein phosphatase 1, regulatory (inhibitor   | 0.99 |
| PPP1R14C;226907_at    | PPP1R14C     | protein phosphatase 1, regulatory (inhibitor   | 1.11 |
| PPP2R2C;228010_at     | PPP2R2C      | protein phosphatase 2 (formerly 2A), regula    | 0.94 |
| PTGER3;210375_at      | PTGER3       | prostaglandin E receptor 3 (subtype EP3)       | 1.11 |
| PTK6;1553114_a_at     | PTK6         | PTK6 protein tyrosine kinase 6                 | 1.19 |
| RAB40C;227698_s_at    | RAB40C       | RAB40C, member RAS oncogene family             | 0.93 |
| RAET1E;1552777_a_at   | RAET1E       | retinoic acid early transcript 1E              | 1.30 |
| RAPGEFL1;218657_at    | RAPGEFL1     | Rap guanine nucleotide exchange factor (GE     | 0.99 |
| RASSF9;210335_at      | RASSF9       | Ras association (RalGDS/AF-6) domain famil     | 0.87 |
| RDH13;1559190_s_at    | RDH13        | retinol dehydrogenase 13 (all-trans/9-cis)     | 1.03 |
| RHOV;241990_at        | RHOV         | ras homolog gene family, member V              | 1.28 |
| SCEL;206884_s_at      | SCEL         | sciellin                                       | 1.05 |
| SDR42E1;229522_at     | SDR42E1      | short chain dehydrogenase/reductase family     | 1.13 |
| SERPINA12;1552544_at  | SERPINA12    | serpin peptidase inhibitor, clade A (alpha-1 a | 1.33 |
| STARD5;213820_s_at    | STARD5       | StAR-related lipid transfer (START) domain c   | 1.16 |
| SYT8;232802_at        | SYT8         | synaptotagmin VIII                             | 0.96 |
| TOB2;222243_s_at      | TOB2         | transducer of ERBB2, 2                         | 1.01 |
| TP63;209863_s_at      | TP63         | tumor protein p63                              | 0.89 |
| UNQ1887;224639_at     | UNQ1887      | signal peptide peptidase 3                     | 1.04 |
| WWC1;213085_s_at      | WWC1         | WW and C2 domain containing 1                  | 1.04 |
| XG;1554062_at         | XG           | Xg blood group                                 | 1.25 |



|                       |           |                                                |      |
|-----------------------|-----------|------------------------------------------------|------|
| ZBTB7C;227782_at      | ZBTB7C    | zinc finger and BTB domain containing 7C       | 1.09 |
| ZNF57;1554628_at      | ZNF57     | zinc finger protein 57                         | 0.99 |
| ZNF770;220608_s_at    | ZNF770    | zinc finger protein 770                        | 0.86 |
| ADH7;210505_at        | ADH7      | alcohol dehydrogenase 7 (class IV), mu or sig  | 1.00 |
| AGR2;209173_at        | AGR2      | anterior gradient homolog 2 (Xenopus laevis    | 0.47 |
| AGR2;228969_at        | AGR2      | anterior gradient homolog 2 (Xenopus laevis    | 0.60 |
| ALDH3A1;205623_at     | ALDH3A1   | aldehyde dehydrogenase 3 family, member/       | 0.93 |
| ATP12A;207367_at      | ATP12A    | ATPase, H+/K+ transporting, nongastric, alpl   | 0.57 |
| C10orf81;1554190_s_at | C10orf81  | chromosome 10 open reading frame 81            | 1.32 |
| C10orf81;219857_at    | C10orf81  | chromosome 10 open reading frame 81            | 1.50 |
| C11orf88;1568606_at   | C11orf88  | chromosome 11 open reading frame 88            | 1.10 |
| C13orf30;1556711_at   | C13orf30  | chromosome 13 open reading frame 30            | 1.06 |
| C1orf192;231077_at    | C1orf192  | chromosome 1 open reading frame 192            | 1.27 |
| C1orf88;228100_at     | C1orf88   | chromosome 1 open reading frame 88             | 0.92 |
| C20orf114;226067_at   | C20orf114 | chromosome 20 open reading frame 114           | 1.14 |
| C20orf85;229542_at    | C20orf85  | chromosome 20 open reading frame 85            | 1.15 |
| C7orf57;1557636_a_at  | C7orf57   | chromosome 7 open reading frame 57             | 1.05 |
| C9orf24;229012_at     | C9orf24   | chromosome 9 open reading frame 24             | 1.15 |
| CAPSL;236085_at       | CAPSL     | calcyphosine-like                              | 1.03 |
| CCDC17;236320_at      | CCDC17    | coiled-coil domain containing 17               | 0.87 |
| CHST9;223737_x_at     | CHST9     | carbohydrate (N-acetylgalactosamine 4-0) su    | 1.00 |
| CHST9;224400_s_at     | CHST9     | carbohydrate (N-acetylgalactosamine 4-0) su    | 0.96 |
| CXCL17;226960_at      | CXCL17    | chemokine (C-X-C motif) ligand 17              | 1.16 |
| CYP2B7P1;210272_at    | CYP2B7P1  | cytochrome P450, family 2, subfamily B, pol    | 0.75 |
| CYP2F1;207913_at      | CYP2F1    | cytochrome P450, family 2, subfamily F, pol    | 1.09 |
| CYP4X1;227702_at      | CYP4X1    | cytochrome P450, family 4, subfamily X, pol    | 1.05 |
| DNAI1;220125_at       | DNAI1     | dynein, axonemal, intermediate chain 1         | 1.21 |
| DYDC2;239733_at       | DYDC2     | DPY30 domain containing 2                      | 1.04 |
| EFCAB1;220156_at      | EFCAB1    | EF-hand calcium binding domain 1               | 1.12 |
| ELF3;201510_at        | ELF3      | E74-like factor 3 (ets domain transcription fa | 1.49 |
| ELF3;210827_s_at      | ELF3      | E74-like factor 3 (ets domain transcription fa | 1.19 |
| ELF3;229842_at        | ELF3      | E74-like factor 3 (ets domain transcription fa | 1.48 |
| FGFR3;204380_s_at     | FGFR3     | fibroblast growth factor receptor 3            | 0.87 |
| FOXA1;204667_at       | FOXA1     | forkhead box A1                                | 1.07 |
| FOXJ1;205906_at       | FOXJ1     | forkhead box J1                                | 1.11 |
| FUT2;210608_s_at      | FUT2      | fucosyltransferase 2 (secretor status include  | 1.22 |
| FUT6;210398_x_at      | FUT6      | fucosyltransferase 6 (alpha (1,3) fucosyltran: | 1.05 |
| FUT6;210399_x_at      | FUT6      | fucosyltransferase 6 (alpha (1,3) fucosyltran: | 1.24 |
| FUT6;211465_x_at      | FUT6      | fucosyltransferase 6 (alpha (1,3) fucosyltran: | 1.15 |
| FUT6;211885_x_at      | FUT6      | fucosyltransferase 6 (alpha (1,3) fucosyltran: | 1.18 |
| GPR110;235988_at      | GPR110    | G protein-coupled receptor 110                 | 1.07 |
| GPR110;238689_at      | GPR110    | G protein-coupled receptor 110                 | 1.19 |
| LRRC10B;236666_s_at   | LRRC10B   | leucine rich repeat containing 10B             | 0.86 |
| LRRC23;206076_at      | LRRC23    | leucine rich repeat containing 23              | 0.95 |
| LRRC46;230601_s_at    | LRRC46    | leucine rich repeat containing 46              | 1.00 |
| MS4A8B;224355_s_at    | MS4A8B    | membrane-spanning 4-domains, subfamily A       | 1.04 |
| MUC1;207847_s_at      | MUC1      | mucin 1, cell surface associated               | 0.30 |
| MUC1;211695_x_at      | MUC1      | mucin 1, cell surface associated               | 0.52 |
| MUC1;213693_s_at      | MUC1      | mucin 1, cell surface associated               | 0.41 |
| MUC20;226622_at       | MUC20     | mucin 20, cell surface associated              | 0.63 |

|                      |            |                                              |      |
|----------------------|------------|----------------------------------------------|------|
| MUC4;217110_s_at     | MUC4       | mucin 4, cell surface associated             | 1.08 |
| NA;1561368_at        | NA         | NA                                           | 1.05 |
| NA;206754_s_at       | NA         | NA                                           | 0.78 |
| NA;222271_at         | NA         | NA                                           | 1.10 |
| NA;235892_at         | NA         | NA                                           | 1.13 |
| NA;236489_at         | NA         | NA                                           | 1.11 |
| OMG;238720_at        | OMG        | oligodendrocyte myelin glycoprotein          | 1.02 |
| PIGR;204213_at       | PIGR       | polymeric immunoglobulin receptor            | 1.14 |
| PIGR;226147_s_at     | PIGR       | polymeric immunoglobulin receptor            | 1.39 |
| PLUNC;220542_s_at    | PLUNC      | palate, lung and nasal epithelium associated | 1.05 |
| POU2AF1;1569675_at   | POU2AF1    | POU class 2 associating factor 1             | 0.94 |
| PRR15L;219127_at     | PRR15L     | proline rich 15-like                         | 1.54 |
| PSCA;205319_at       | PSCA       | prostate stem cell antigen                   | 1.17 |
| RSPH1;230093_at      | RSPH1      | radial spoke head 1 homolog (Chlamydomor     | 1.09 |
| SCGB3A1;230378_at    | SCGB3A1    | secretoglobin, family 3A, member 1           | 1.72 |
| SERPINB11;1552463_at | SERPINB11  | serpin peptidase inhibitor, clade B (ovalbum | 0.91 |
| SLC34A2;204124_at    | SLC34A2    | solute carrier family 34 (sodium phosphate), | 1.17 |
| SLC44A4;1555203_s_at | SLC44A4    | solute carrier family 44, member 4           | 1.12 |
| SLC44A4;205597_at    | SLC44A4    | solute carrier family 44, member 4           | 0.89 |
| SNTN;239150_at       | SNTN       | sentan, cilia apical structure protein       | 1.07 |
| SPAG6;210033_s_at    | SPAG6      | sperm associated antigen 6                   | 1.21 |
| SPEF1;216119_s_at    | SPEF1      | sperm flagellar 1                            | 1.23 |
| ST6GALNAC1;227725_at | ST6GALNAC1 | ST6 (alpha-N-acetyl-neuraminyl-2,3-beta-gal  | 0.98 |
| STATH;206835_at      | STATH      | statherin                                    | 0.97 |
| TMC4;226403_at       | TMC4       | transmembrane channel-like 4                 | 1.11 |
| TMEM190;1552594_at   | TMEM190    | transmembrane protein 190                    | 1.19 |
| TMPRSS4;218960_at    | TMPRSS4    | transmembrane protease, serine 4             | 1.21 |
| TSPAN1;209114_at     | TSPAN1     | tetraspanin 1                                | 1.18 |
| VSIG2;228232_s_at    | VSIG2      | V-set and immunoglobulin domain containir    | 1.24 |
| VSTM2L;226973_at     | VSTM2L     | V-set and transmembrane domain containin     | 1.01 |
| WDR16;239916_at      | WDR16      | WD repeat domain 16                          | 1.05 |
| WFDC2;203892_at      | WFDC2      | WAP four-disulfide core domain 2             | 1.25 |
| ZMYND10;205714_s_at  | ZMYND10    | zinc finger, MYND-type containing 10         | 1.01 |
| ZMYND10;216663_s_at  | ZMYND10    | zinc finger, MYND-type containing 10         | 1.17 |
| HLA-A;213932_x_at    | HLA-A      | major histocompatibility complex, class I, A | 0.99 |
| HLA-A;215313_x_at    | HLA-A      | major histocompatibility complex, class I, A | 1.04 |
| HLA-B;208729_x_at    | HLA-B      | major histocompatibility complex, class I, B | 1.07 |
| HLA-B;209140_x_at    | HLA-B      | major histocompatibility complex, class I, B | 1.05 |
| HLA-B;211911_x_at    | HLA-B      | major histocompatibility complex, class I, B | 1.10 |
| HLA-C;208812_x_at    | HLA-C      | major histocompatibility complex, class I, C | 0.95 |
| HLA-C;211799_x_at    | HLA-C      | major histocompatibility complex, class I, C | 1.02 |
| HLA-C;214459_x_at    | HLA-C      | major histocompatibility complex, class I, C | 0.99 |
| HLA-C;216526_x_at    | HLA-C      | major histocompatibility complex, class I, C | 1.01 |
| HLA-E;200905_x_at    | HLA-E      | major histocompatibility complex, class I, E | 0.94 |
| HLA-E;217456_x_at    | HLA-E      | major histocompatibility complex, class I, E | 0.95 |
| HLA-F;204806_x_at    | HLA-F      | major histocompatibility complex, class I, F | 0.94 |
| HLA-F;221875_x_at    | HLA-F      | major histocompatibility complex, class I, F | 0.91 |
| HLA-G;210514_x_at    | HLA-G      | major histocompatibility complex, class I, G | 1.02 |
| HLA-G;211528_x_at    | HLA-G      | major histocompatibility complex, class I, G | 0.98 |
| HLA-G;211529_x_at    | HLA-G      | major histocompatibility complex, class I, G | 1.01 |

|                      |           |                                                |      |
|----------------------|-----------|------------------------------------------------|------|
| HLA-G;211530_x_at    | HLA-G     | major histocompatibility complex, class I, G   | 1.05 |
| HLA-J;217436_x_at    | HLA-J     | major histocompatibility complex, class I, J ( | 1.12 |
| ACADL;206068_s_at    | ACADL     | acyl-Coenzyme A dehydrogenase, long chain      | 1.09 |
| ACADL;206069_s_at    | ACADL     | acyl-Coenzyme A dehydrogenase, long chain      | 0.96 |
| ANO1;218804_at       | ANO1      | anoctamin 1, calcium activated chloride cha    | 0.85 |
| C11orf52;238805_at   | C11orf52  | chromosome 11 open reading frame 52            | 0.98 |
| CNGA1;206417_at      | CNGA1     | cyclic nucleotide gated channel alpha 1        | 1.34 |
| CYP39A1;1553977_a_at | CYP39A1   | cytochrome P450, family 39, subfamily A, pc    | 1.14 |
| CYP39A1;220432_s_at  | CYP39A1   | cytochrome P450, family 39, subfamily A, pc    | 0.97 |
| EPHX2;209368_at      | EPHX2     | epoxide hydrolase 2, cytoplasmic               | 0.97 |
| HYAL1;210619_s_at    | HYAL1     | hyaluronoglucosaminidase 1                     | 1.40 |
| NA;1556122_at        | NA        | NA                                             | 1.08 |
| NA;214415_at         | NA        | NA                                             | 0.80 |
| NA;231704_at         | NA        | NA                                             | 0.83 |
| NA;235937_at         | NA        | NA                                             | 1.16 |
| SEC16B;1552880_at    | SEC16B    | SEC16 homolog B ( <i>S. cerevisiae</i> )       | 0.78 |
| TRPM8;243483_at      | TRPM8     | transient receptor potential cation channel,   | 0.93 |
| UNC5CL;231008_at     | UNC5CL    | unc-5 homolog C ( <i>C. elegans</i> )-like     | 0.93 |
| BEGAIN;220795_s_at   | BEGAIN    | brain-enriched guanylate kinase-associated l   | 1.11 |
| CHRM3;214596_at      | CHRM3     | cholinergic receptor, muscarinic 3             | 1.17 |
| EML5;1568777_at      | EML5      | echinoderm microtubule associated protein      | 0.87 |
| NA;231214_at         | NA        | NA                                             | 0.96 |
| NA;235079_at         | NA        | NA                                             | 0.79 |
| NA;239708_at         | NA        | NA                                             | 1.78 |
| NA;241873_at         | NA        | NA                                             | 1.09 |
| NA;243339_at         | NA        | NA                                             | 1.09 |
| NA;244114_x_at       | NA        | NA                                             | 0.76 |
| NA;244359_s_at       | NA        | NA                                             | 0.74 |
| NA;244532_x_at       | NA        | NA                                             | 0.78 |
| NBLA00301;236141_at  | NBLA00301 | Nbla00301                                      | 1.82 |
| PCLO;210650_s_at     | PCLO      | piccolo (presynaptic cytomatrix protein)       | 0.88 |
| RIMBP2;214811_at     | RIMBP2    | RIMS binding protein 2                         | 0.75 |
| TFAP2B;1553394_a_at  | TFAP2B    | transcription factor AP-2 beta (activating enl | 0.79 |
| TFAP2B;214451_at     | TFAP2B    | transcription factor AP-2 beta (activating enl | 0.88 |
| CD74;209619_at       | CD74      | CD74 molecule, major histocompatibility coi    | 0.95 |
| HLA-DMB;203932_at    | HLA-DMB   | major histocompatibility complex, class II, D  | 0.94 |
| HLA-DPA1;211990_at   | HLA-DPA1  | major histocompatibility complex, class II, D  | 0.98 |
| HLA-DPA1;211991_s_at | HLA-DPA1  | major histocompatibility complex, class II, D  | 0.93 |
| HLA-DPA1;213537_at   | HLA-DPA1  | major histocompatibility complex, class II, D  | 1.06 |
| HLA-DPB1;201137_s_at | HLA-DPB1  | major histocompatibility complex, class II, D  | 0.72 |
| HLA-DRA;208894_at    | HLA-DRA   | major histocompatibility complex, class II, D  | 0.92 |
| HLA-DRA;210982_s_at  | HLA-DRA   | major histocompatibility complex, class II, D  | 0.98 |
| HLA-DRB4;208306_x_at | HLA-DRB4  | major histocompatibility complex, class II, D  | 0.96 |
| HLA-DRB6;217362_x_at | HLA-DRB6  | major histocompatibility complex, class II, D  | 0.93 |
| NA;204670_x_at       | NA        | NA                                             | 1.24 |
| NA;209312_x_at       | NA        | NA                                             | 1.03 |
| NA;212671_s_at       | NA        | NA                                             | 0.95 |
| NA;215193_x_at       | NA        | NA                                             | 0.95 |
| NA;217478_s_at       | NA        | NA                                             | 1.00 |
| ITGB4;204989_s_at    | ITGB4     | integrin, beta 4                               | 0.98 |

|                        |           |                                             |      |
|------------------------|-----------|---------------------------------------------|------|
| ITGB4;204990_s_at      | ITGB4     | integrin, beta 4                            | 1.07 |
| ITGB4;211905_s_at      | ITGB4     | integrin, beta 4                            | 0.91 |
| LAMA3;203726_s_at      | LAMA3     | laminin, alpha 3                            | 0.97 |
| LAMB3;209270_at        | LAMB3     | laminin, beta 3                             | 1.07 |
| LAMC2;202267_at        | LAMC2     | laminin, gamma 2                            | 0.91 |
| LAMC2;207517_at        | LAMC2     | laminin, gamma 2                            | 0.92 |
| NA;1556773_at          | NA        | NA                                          | 0.84 |
| PADI3;220779_at        | PADI3     | peptidyl arginine deiminase, type III       | 0.65 |
| PTH LH;206300_s_at     | PTH LH    | parathyroid hormone-like hormone            | 0.95 |
| PTH LH;210355_at       | PTH LH    | parathyroid hormone-like hormone            | 0.66 |
| PTH LH;211756_at       | PTH LH    | parathyroid hormone-like hormone            | 0.62 |
| TP63;211194_s_at       | TP63      | tumor protein p63                           | 0.87 |
| TP63;211834_s_at       | TP63      | tumor protein p63                           | 1.13 |
| WDR66;1555007_s_at     | WDR66     | WD repeat domain 66                         | 0.89 |
| C19orf33;223631_s_at   | C19orf33  | chromosome 19 open reading frame 33         | 1.23 |
| FGFBP1;205014_at       | FGFBP1    | fibroblast growth factor binding protein 1  | 1.58 |
| FX YD3;202489_s_at     | FX YD3    | FX YD domain containing ion transport regul | 1.07 |
| KRT5;201820_at         | KRT5      | keratin 5                                   | 0.99 |
| PERP;217744_s_at       | PERP      | PERP, TP53 apoptosis effector               | 0.96 |
| PERP;222392_x_at       | PERP      | PERP, TP53 apoptosis effector               | 1.03 |
| PTK6;206482_at         | PTK6      | PTK6 protein tyrosine kinase 6              | 1.02 |
| RHBDL2;1554895_a_at    | RHBDL2    | rhomboid, veinlet-like 2 (Drosophila)       | 1.05 |
| RHBDL2;1554897_s_at    | RHBDL2    | rhomboid, veinlet-like 2 (Drosophila)       | 1.21 |
| S100A14;218677_at      | S100A14   | S100 calcium binding protein A14            | 0.94 |
| S100A2;204268_at       | S100A2    | S100 calcium binding protein A2             | 0.92 |
| SDC1;201287_s_at       | SDC1      | syndecan 1                                  | 0.96 |
| TMEM184A;1558281_a_a   | TMEM184A  | transmembrane protein 184A                  | 1.07 |
| TRIM7;223694_at        | TRIM7     | tripartite motif-containing 7               | 1.15 |
| COL12A1;225664_at      | COL12A1   | collagen, type XII, alpha 1                 | 0.95 |
| COL1A1;1556499_s_at    | COL1A1    | collagen, type I, alpha 1                   | 0.86 |
| COL1A1;202310_s_at     | COL1A1    | collagen, type I, alpha 1                   | 0.90 |
| COL1A2;202403_s_at     | COL1A2    | collagen, type I, alpha 2                   | 0.94 |
| COL1A2;202404_s_at     | COL1A2    | collagen, type I, alpha 2                   | 0.83 |
| COL3A1;201852_x_at     | COL3A1    | collagen, type III, alpha 1                 | 0.83 |
| COL3A1;211161_s_at     | COL3A1    | collagen, type III, alpha 1                 | 0.87 |
| COL3A1;215076_s_at     | COL3A1    | collagen, type III, alpha 1                 | 0.83 |
| COL6A1;213428_s_at     | COL6A1    | collagen, type VI, alpha 1                  | 1.02 |
| COL6A2;209156_s_at     | COL6A2    | collagen, type VI, alpha 2                  | 1.16 |
| COL6A3;201438_at       | COL6A3    | collagen, type VI, alpha 3                  | 0.90 |
| MXRA8;213422_s_at      | MXRA8     | matrix-remodelling associated 8             | 1.12 |
| ACVR1C;1552519_at      | ACVR1C    | activin A receptor, type IC                 | 0.42 |
| ADIPOQ;207175_at       | ADIPOQ    | adiponectin, C1Q and collagen domain cont   | 0.68 |
| AOC3;204894_s_at       | AOC3      | amine oxidase, copper containing 3 (vascula | 0.84 |
| AQP7;206955_at         | AQP7      | aquaporin 7                                 | 0.71 |
| C14orf180;1558421_a_at | C14orf180 | chromosome 14 open reading frame 180        | 1.19 |
| CIDEC;219398_at        | CIDEC     | cell death-inducing DFFA-like effector c    | 0.80 |
| KCNIP2;223727_at       | KCNIP2    | Kv channel interacting protein 2            | 0.86 |
| LIPE;213855_s_at       | LIPE      | lipase, hormone-sensitive                   | 0.79 |
| MRAP;1554044_a_at      | MRAP      | melanocortin 2 receptor accessory protein   | 0.86 |
| MRAP;1555740_a_at      | MRAP      | melanocortin 2 receptor accessory protein   | 0.68 |

|                   |        |                                               |      |
|-------------------|--------|-----------------------------------------------|------|
| PLIN1;205913_at   | PLIN1  | perilipin 1                                   | 0.82 |
| PLIN4;228409_at   | PLIN4  | perilipin 4                                   | 0.96 |
| ACVRL1;226950_at  | ACVRL1 | activin A receptor type II-like 1             | 1.31 |
| ECSCR;227779_at   | ECSCR  | endothelial cell-specific chemotaxis regulatc | 0.96 |
| ECSCR;228339_at   | ECSCR  | endothelial cell-specific chemotaxis regulatc | 0.95 |
| ESAM;225369_at    | ESAM   | endothelial cell adhesion molecule            | 0.93 |
| MMRN2;219091_s_at | MMRN2  | multimerin 2                                  | 0.93 |
| MMRN2;236262_at   | MMRN2  | multimerin 2                                  | 0.88 |























|                          |             |
|--------------------------|-------------|
| MHC_class1               | Cluster0035 |
| MHC_class1               | Cluster0035 |
| Hepatocytes              | Cluster0042 |
| Neurones                 | Cluster0044 |
| MHC_class2               | Cluster0047 |
| Epithelium:keratinocytes | Cluster0048 |
